# Supplementary material for: Unsustainable anthropogenic mortality disrupts natal dispersal and promotes inbreeding in leopards
Source: PubMed Central journal article supplement (PMC7160178; doi:10.1002/ece3.6089), 2020-03-18

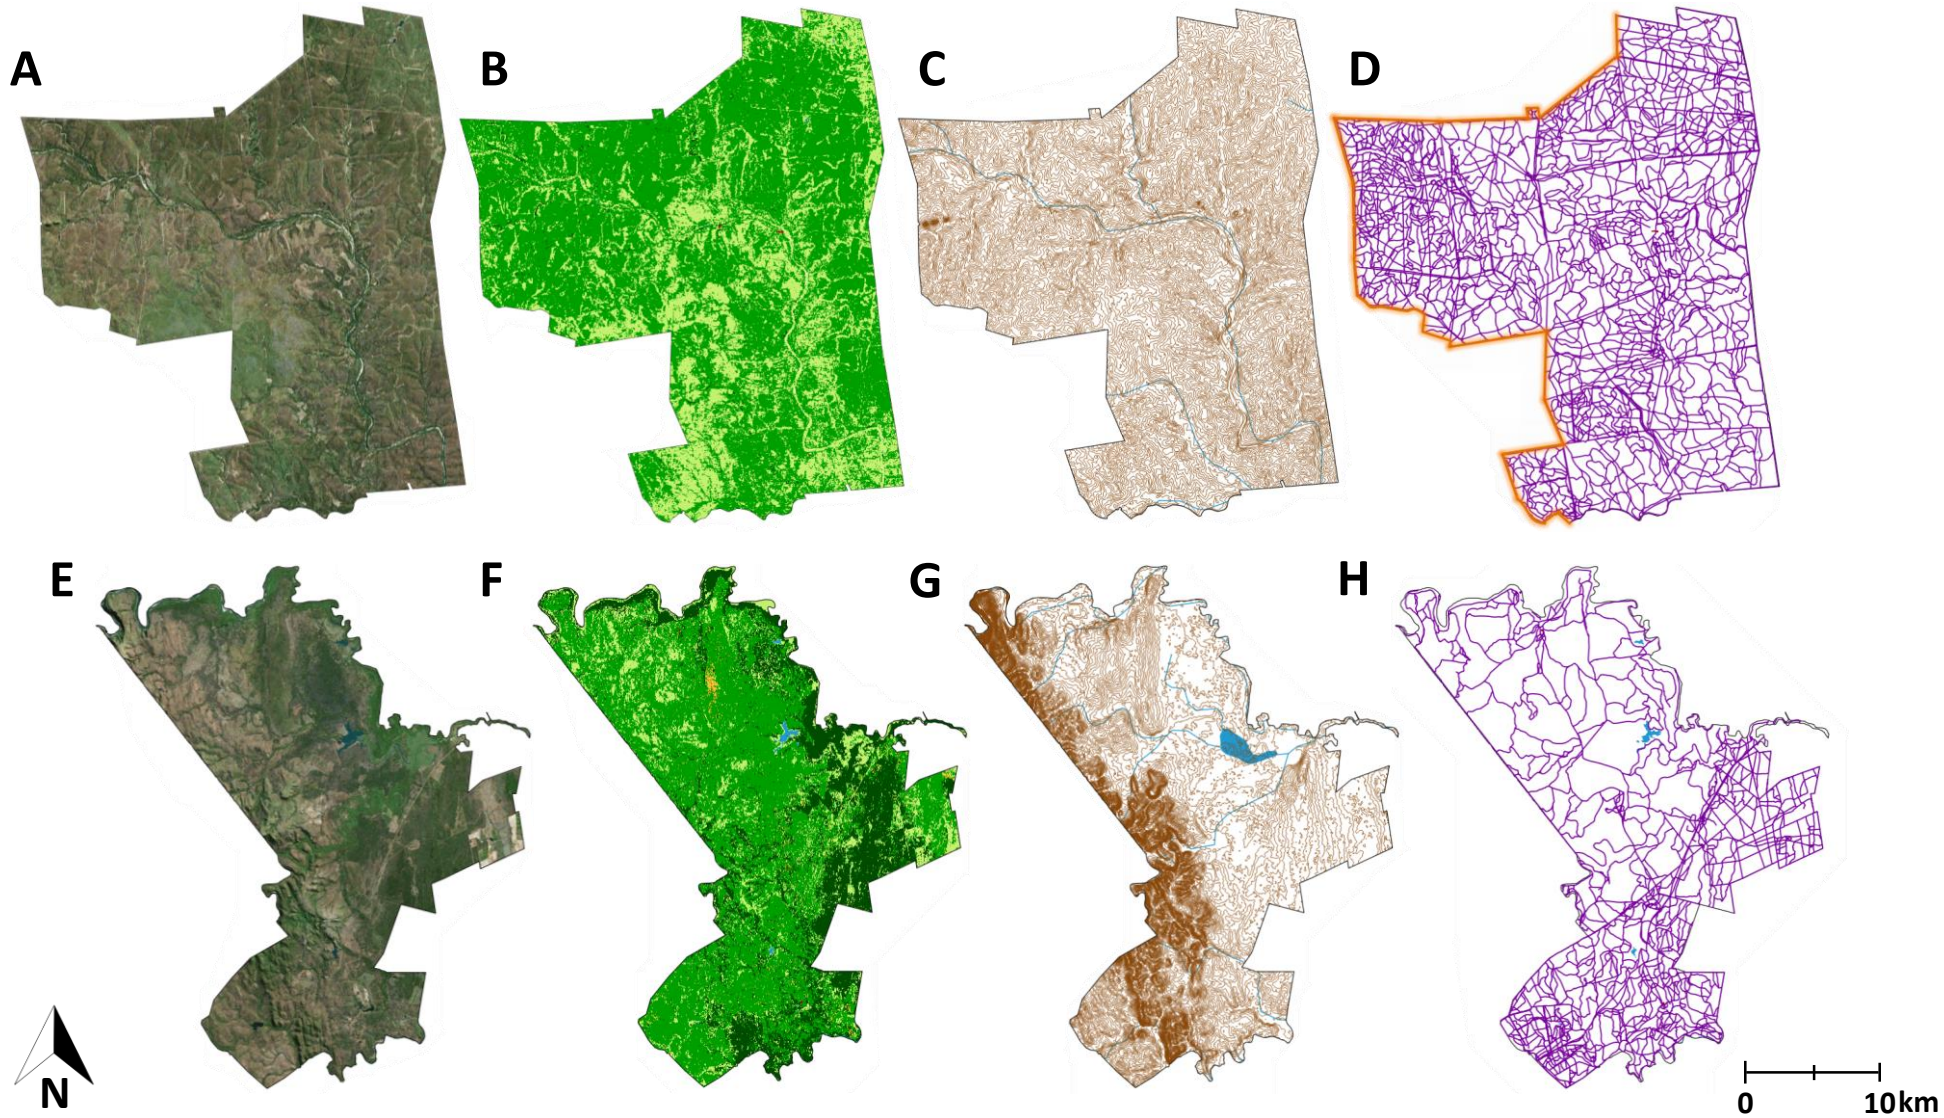

Supplement: ECE3-10-3605-s002.pdf [file ECE3-10-3605-s002.pdf]
